# Supplementary material
Source: PubMed Central journal article supplement (PMC4035957)
Supplement: 1404462111_pnas.201404462SI.pdf [file 1404462111_pnas.201404462SI.pdf]

# Supporting Information

Kravchenko-Balasha et al. 10.1073/pnas.1404462111

## SI Text

### Supporting Theory Surprisal Analysis

**Theory.** We apply the procedure of maximal entropy to describe a two-cell system under constraints.

Assumptions and applications:

1. The two-cell system is in a state of maximal entropy subject to constraints at every distance range. Our goal is to find the (distance dependent) constraints that prevent the entropy from reaching the global maximum. The global maximum of the entropy is the steady state, a state without any constraints on the biological networks. The constraints are detected and quantified by identifying how the protein expression levels respond to those constraints. For each measured protein, the extent of participation of the protein in the biological process responding to constraints is defined.
2. The experimentally determined mean values,  $X_i$ , of the functional proteins as a function of distance are used to identify the constraints.
3. Constraints prevent the entropy from reaching the global maximum, and thereby generate deviations from the steady state. We seek to define the protein concentrations  $X_i^o$  at the steady state—the state at the global maximum of the entropy—and compare it to the experimental protein levels.
4. We seek to define distance ranges with minimal deviations from the steady state; these are the most stable states of the system and thus are most probable.
5. To determine the distance ranges with minimal constraints we use surprisal analysis as presented in Eq. 1 in the main text.

Here we give a very brief summary how this equation was developed. For more details, see refs. 1–5. First, we relate protein concentrations to the chemical potential using the fundamental physical chemical relationships (6):

$$\begin{aligned} \underbrace{\mu_i}_{\text{free energy in a solution}} &= \underbrace{\mu_i^{SS}}_{\text{standard free energy}} + kT \ln X_i \\ \underbrace{\mu_i^o}_{\text{free energy at the steady state}} &= \underbrace{\mu_i^{SS}}_{\text{standard free energy}} + kT \ln X_i^o \end{aligned} \quad [\text{S1}]$$

By solving the system of the above equations we obtain

$$\ln X_i = \ln X_i^o + (\mu_i - \mu_i^o)/kT. \quad [\text{S2}]$$

From the experimental data  $X_i$ , we seek to obtain  $X_i^o$ , which is the functional protein expression expected at the steady state, as well as  $(\mu_i - \mu_i^o)/kT$ , which is the deviation from the steady state. Note from the equation that this deviation represents a change in a free energy of the system due to the constraint(s). As written above, we assume that at every distance range the biological system is in a state of maximal entropy subject to constraints. In addition to the calculation of the expected protein distributions at the maximal entropy  $X_i^o$  and deviations from  $X_i^o$  as a function of distance, we want to find biological networks responding to the constraints, and to calculate a weight  $\lambda_\alpha$  for every existing constraint  $\alpha$ .

To determine the change in the chemical potentials, we recall that they are Lagrange multipliers (6, 7) and so we use the technique of undetermined multipliers. For this technique, each multiplier is associated with a constraint on the system. A way to

perform such a search (5) is to find the maximum entropy of the system subject to constraints:

$$\mathcal{E} = \text{entropy} - \sum_{\alpha} \lambda_{\alpha} \text{constraint}_{\alpha} \quad [\text{S3}]$$

The sum over  $\alpha$  is over all of the constraints. The numbers  $\lambda_{\alpha}$  (weights of the constraints) are the Lagrange undetermined multipliers. Seeking the unconstrained maximum of  $\mathcal{E}$  is the solution to our problem of maximization of the entropy subject to constraints. To develop a working equation, the expression for the entropy of mixture of species in the cell was used (5). Constraints are presented as  $\langle G_{\alpha} \rangle = \sum_i G_{i\alpha} X_i$ . This equation means that the number  $X_i$  of protein molecules  $i$  is limited by the quantity  $\langle G_{\alpha} \rangle$ , which represents a biological network responding to the constraints  $\alpha$ . Thus,  $\alpha$  is the label of the constraint.  $G_{i\alpha}$  is the extent of participation of protein  $i$  in the biological process responding to the constraint  $\alpha$  (5).

The maximum of the function (Eq. S3) leads to the exponential form

$$X_i(r) = X_i^o \exp\left(-\sum_{\alpha=1} G_{i\alpha} \lambda_{\alpha}(r)\right). \quad [\text{S4}]$$

The values  $G_{i\alpha}$  represent the extent of participation of a protein  $i$  in a constraint  $\alpha$ . The exponent of the above equation,  $-\sum_{\alpha=1} G_{i\alpha} \lambda_{\alpha}(r)$ , describes deviation from the steady state. Thereby we have our key result  $\sum_{\alpha=1} G_{i\alpha} \lambda_{\alpha}(r) = (\mu_i - \mu_i^o)/kT$ . By taking a natural logarithm in Eq. S4 we obtain the working equation (Eq. 1 in the main text):

$$\ln X_i(r) = \ln X_i^o(r) - \sum_{\alpha=1} G_{i\alpha} \lambda_{\alpha}(r) \quad [\text{S5}]$$

To make the steady-state term mimic the look of a deviation term, it is convenient to write  $\ln X_i^o(r) = G_{i0} \lambda_0(r)$  (5). In this way, Eq. 1 can be written as  $\ln X_i(r) = \sum_{\alpha=0} G_{i\alpha} \lambda_{\alpha}(r)$ .

Because the cells in the chamber are not free to move, we impose the constraints separately at each range of cell–cell distance  $r$ . Thereby there is a set of Lagrange multipliers for each range of cell–cell distances. A given constraint  $\alpha$  can have a large weight ( $\lambda_{\alpha}$ ) at some specific range of intercellular separation distances, but can have effectively a negligible weight at other distances (see Fig. S2A for more details). We look for those distance ranges that have very similar values of  $X_i(r)$  and  $X_i^o(r)$ , meaning that  $\sum_{\alpha=1} G_{i\alpha} \lambda_{\alpha}(r) \approx 0$ .

**Calculation of the parameters  $\lambda_{\alpha}$  and  $G_{i\alpha}$ .** We want to fit the sum of the terms as shown on the right-hand side of Eq. S5 (Eq. 1 in the main text) to the logarithm of the measured expression level of protein  $i$  at the distance  $r$ , and this has to be repeated for every distance. We use the singular value decomposition (SVD) (ref. 5 and more below) method for diagonalizing a matrix that includes mean values of functional protein distributions from two separated cells (Table S2, rows) at a certain distance range (Table S2, columns). Table S2 contains the mean values of six functional protein distributions at six distance ranges. Using this data we determine two sets of parameters: the Lagrange multipliers  $\lambda_{\alpha}$  for all  $\alpha$ 's at each distance, and the time-independent vector  $G_{i\alpha}$  for each of the  $i$  proteins.

**SVD Analysis.** For the SVD we generate a matrix  $\mathbf{Y}$  from the entries of Table S2 using the natural log of the average functional protein

levels (5), as indicated in the main text. Using SVD, we construct two square (and symmetric) matrices; the first one is  $\mathbf{Y}^T\mathbf{Y}$ . To determine constraints we use  $\mathbf{Y}^T\mathbf{Y}\lambda_\alpha = \omega_\alpha^2\lambda_\alpha$ ,  $\alpha = 0, 1, 2, \dots, A-1$ .  $\lambda_\alpha$  is an eigenvector and  $\omega_\alpha^2$  is an eigenvalue of the matrix  $\mathbf{Y}^T\mathbf{Y}$ . The components of the vector  $\lambda_\alpha$  provide the weights of the constraint  $\alpha$  at each of the distance ranges  $r$ . The maximal number of nonzero eigenvalues  $\lambda_\alpha$  is  $A$ , where  $A$  is the smaller of the dimensions of the matrix  $\mathbf{Y}$ . The mathematically exact statement is that  $A$  is the rank of the matrix  $\mathbf{Y}$ . Here  $A$ , the maximal number of possible constraints, is equal to the number of binned distances [six for U87 EGF receptor variant III (EGFRvIII) cells]. However, as discussed in the main text, only one or two of those constraints have nonzero eigenvalues and thus play significant roles.

To determine the  $G_{i\alpha}$ , we generate a second matrix:  $\mathbf{Y}\mathbf{Y}^T$  (5). This conjugated matrix has the same value of eigenvalues  $\omega_\alpha^2$ :  $\mathbf{Y}\mathbf{Y}^T\mathbf{G}_\alpha = \omega_\alpha^2\mathbf{G}_\alpha$ ,  $\alpha = 0, 1, 2, \dots, A-1$ .  $\mathbf{G}_\alpha$  is a column vector of six components, each component corresponding to a measured protein.

**Output of the Surprisal Analysis.** As shown in Table S3,  $\alpha = 0$  has the biggest weight. This is the steady state. Constraints 3–5 are within the noise value as indicated by their low values. As written above, we use experimental protein levels  $X_i(r)$  to calculate the steady-state expression levels and deviations from the steady state using  $\ln X_i(r) = \sum_{\alpha=0} G_{i\alpha}\lambda_\alpha(r)$ . From Table S3 and Fig. 2B one can see that the steady-state levels yield the largest contribution to the observed expression level of each protein at each distance range. The constraint  $\alpha = 1$ , which is the most dominant constraint, changes sign  $\sim 80$ – $100\ \mu\text{m}$  (Table S3). Thus, between 80 and 100  $\mu\text{m}$ , the two-cell system hardly deviates from the steady state according to the constraint  $\alpha = 1$ .  $\lambda_\alpha(r)$  values for U87PTEN cells are provided in Table S4. For the input we used a natural logarithm of the protein expression levels as a function of distance.

**DPE Function.** We define DPE function (deviation in free energy per protein molecule), which is calculated using the equation below (Eq. 2 in the main text):

$$DPE(r) = \left\{ \sum_i X_i(r) [\ln(X_i(r)/X_i^o(r))] - \sum_i (X_i(r) - X_i^o(r)) \right\} / \left\{ \sum_i X_i(r) \right\}$$

DPE is calculated using the measured levels (copy numbers),  $X_i(r)$ , of the proteins in the EGFR network and calculated protein levels at the steady state  $X_i^o(r)$ . When  $X_i(r) = X_i^o(r)$ , the value of DPE( $r$ ) at that distance range will vanish, meaning no deviation from the steady state at that  $r$ . The numerator in Eq. 2 is divided by  $\sum_i X_i(r)$  (sum of all protein molecules at a given distance range  $r$ ) to obtain a deviation from the steady state or a change in a free energy per protein molecule. At all values of  $r$  where the DPE is not zero it is mathematically guaranteed to be positive.

To obtain accurate values for the distance range where the  $\lambda_1(r)$  function equals zero for the U87EGFRvIII, a polynomial curve was fitted to the  $\lambda_1(r)$  function with the following restrictions: all of the original points have had to overlap with the curve as well as the region 80–100  $\mu\text{m}$  ( $R^2 = 1$ ). The same considerations were applied to  $\lambda_2(r)$  and U87PTEN cells.  $\lambda_\alpha(r)$  values were obtained from the curve fit for the original distance ranges and for the point close to the zero.

For molecular species in solution, the free energy is calculated as follows (6):

$$\begin{aligned} \underbrace{\mu_i}_{\text{free energy in a solution}} &= \underbrace{\mu_i^{ss}}_{\text{standard free energy}} + kT \ln X_i \\ \underbrace{\mu_i^o}_{\text{free energy at the steady state}} &= \underbrace{\mu_i^{ss}}_{\text{standard free energy}} + kT \ln X_i^o \end{aligned}$$

These equations form the base of the Eq. 1:  $\ln X_i(r) = \ln X_i^o(r) - \sum_{\alpha=1} G_{i\alpha}\lambda_\alpha(r)$  in the main text. To calculate Eq. 1 we use  $\ln X_i$  instead of  $kT \ln X_i$ , obtaining a deviation from the steady state  $\sum_{\alpha=1} G_{i\alpha}\lambda_\alpha(r) = (\mu_i - \mu_i^o)/kT$ . Therefore, the DPE function, which expresses the deviation from the steady state (1, 8):  $\sum_i X_i(r) [\ln(X_i(r)/X_i^o(r))]$  is dimensionless (because it is divided by the unit of thermal energy  $kT$ ).

**Determination of the Errors for the Calculated Parameters Obtained from Surprisal Analysis.** SVD analysis was performed three times: once for the mean values of the functional proteins, measured as a function of distance; once for the mean values of the protein distribution – SEM for each measured protein; and once for the mean of the distribution + SEM. Thus, three values for each parameter:  $\lambda_\alpha(r)$  and  $G_{i\alpha}$  were obtained. Results of surprisal analysis presented in the article are the mean values of the corresponded parameters  $\pm$  SD (9, 10).

#### Cell–Cell Distance Distribution Measurements and Calculations of $u(r)$

**Function.** Two initial starting conditions were used for the bulk culture experiments. Either 33,000 (low) or 66,000 cells per well [density comparable to the single-cell barcode chip (SCBC) experiments] were seeded into six-well plates. At 6 h later, the medium was replaced with fresh medium and the cells were incubated at 37 °C for 24, 48, and 72 h. At each time point, microscopic images were analyzed using custom algorithms, detecting the centers of the cells and calculating distances between the cells, from cell center to cell center. All of the pairs having a distance up to 200  $\mu\text{m}$  were binned into the histograms to calculate a probability to find a pair of the cell at a certain distance. The obtained probability was divided by a random probability of cell–cell distance distributions computed using Monte Carlo simulation. Random simulations used the same cell density as detected experimentally for each time point. Using the equation relating radial distribution function (RDF) to the two-cell potential of interaction  $u(r)$ , these two parameters were calculated:  $RDF = P_{\text{exp}}/P_{\text{random}} = \exp(-u(r)/kT)$ , where  $P$  is the probability to find two cells at a particular distance and  $u(r)$  indicates potential of interaction of two-cell interaction (7).

#### SI Methods

**Cell Culture.** U87EGFRvIII and U87PTEN were constructed as reported (11) and were kindly provided by Paul Mischel's laboratory (University of California, San Diego, La Jolla, CA). The cells were cultured in DMEM (ATCC) medium supplemented with 10% (vol/vol) FBS in a 5% (vol/vol) CO<sub>2</sub> incubator at 37 °C.

**Antibody Microarray (12).** The microarrays are initially patterned as DNA arrays, because DNA has the physical and chemical stability to withstand the various processing steps of microfluidics fabrication. The DNA itself is patterned onto a polylysine-coated glass slide by two sequential microchannel-based flow patterning steps. The two microchips for those two steps are based on polydimethylsiloxane (PDMS) elastomer sealed with a glass slide, so that 20 microchannels are formed winding from one end to the other end of the glass slide. The first flow-patterning step generates 20- $\mu\text{m}$ -wide 50- $\mu\text{m}$  pitch lines of three unique DNA oligomers, whereas the second DNA patterning step is carried out at right angles to the first. We design the ssDNA sequences for the first and second patterning in such a way that the inter-

section of the two sets of lines will remain a unique ssDNA for assembly location for complementary ssDNA–antibody conjugates. In the current study, we chose a  $3 \times 3$  array, which has the capacity of multiplexed measurement of up to eight different proteins. This addressable nine-element array has been repeated ~19,000 times with various orientations across the whole glass slide, which will be mated with a SCBC elastomer layer. The DNA microarrays can be stored in a desiccator at room temperature for at least a month without detectable degradation.

We validated the patterned DNA array using 100-nM cy5-conjugated cDNA oligomers in 1% BSA in PBS. After incubation for 1 h at 37 °C, the slide was rinsed with 3% BSA in PBS twice and deionized water and dried under flowing N<sub>2</sub> before signal readout by a GenePix scanner (Molecular Devices, LLC). The validation procedure provides a check on the cross-reactivity between the anchor, bridging, and terminal ssDNA oligomers. In addition, the fluorescence intensity per unit area can be compared against standard DNA spotting approaches as a means of gauging surface coverage. Finally, the validation procedure provides an assessment of the fidelity of the microfluidics flow-patterning steps.

The DNA array was converted into antibody array using complementary ssDNA–antibody conjugates. The procedure of conjugation has been described previously (12). Calibration and cross-reactivity characterizations of the barcode assay have been performed before application to single cells. We used recombinant pEGFR, pERK, pAkt, pS6k, VEGF, and IL-6 proteins (R&D Systems, Inc.) at various concentrations to calibrate the fluorescence intensity of a barcode assay with molecule number in a cell chamber with a volume of 0.15 nL. Antibody cross-reactivity assays were carried out using spotted arrays and identical biomolecular reagents.

**Cell Sample Preparation for Single-Cell Assays.** U87 EGFRvIII cells and U87PTEN cells were harvested for experiment after achieving 80% confluency. A total of 1  $\mu$ M 5-chloromethylfluorescein diacetate (CMFDA) in PBS was used to stain live cells and visualize cells in microchambers for counting.

**On-Chip Assay and Quantification (12).** The PDMS layer of SCBC chip is mated onto a barcode glass slide. The microchambers are aligned with the microarray so that each microchamber is ensured of overlapping a complete barcode. Then the microchambers and

microchannels were blocked with 3% BSA in PBS for 1 h before filling a mixture of 10  $\mu$ g/mL antibody–DNA conjugates. After incubation for 1 h and removal of unlinked conjugates, the SCBC was filled with a cell sample and then mounted onto a clamp. With appropriate pressure exerted by the clamp, all microchambers were closed where random number of cells resided in each microchamber. The whole structure was incubated for 6 h at 37 °C in a 5% CO<sub>2</sub> incubator. The clamp was then partially released to draw into the microchambers lysis buffer (20 mM Tris-HCl, 150 mM NaCl, 1 mM Na<sub>2</sub>EDTA, 1 mM EGTA, 1% Triton, 2.5 mM sodium pyrophosphate, 1 mM  $\beta$ -glycerophosphate, 1 mM Na<sub>3</sub>VO<sub>4</sub>, and 1  $\mu$ g/mL leupeptin; Cell Signaling) supplemented with protease/phosphatase inhibitor mixture (Cell Signaling). The SCBC was incubated at room temperature for 2 h to allow proteins captured by the microarray. After labeling the microchannels using 20  $\mu$ M Alexa 514 succinimidyl ester (Molecular Probes, Inc.), biotinylated detection antibody mixtures in 1:18 dilution prepared according to product instruction were injected into the microchannels. Unbound antibodies were washed off, and 1  $\mu$ M cy5 streptavidin and 100 nM H-cy3 in PBS with 3% BSA were used to complete sandwich–ELISA procedure and label barcode arrays. Finally, the glass slide containing the developed arrays was detached and cleaned before scanning by a GenePix Scanner. Fluorescence intensity of each barcode across the whole slide was digitalized and exported to a custom algorithm written in MatLab (MathWorks, Inc.). One array spot [detected using the green reference channel (532 nm)] provides an alignment marker to permit protein identification by spatial location on each of the other array spots [fluorescence detection using red data channel (635 nm)]. The fluorescence intensity of 174,000 barcode spots across the whole slide was exacted and analyzed by a MatLab (MathWorks, Inc.) program developed in our laboratory.

The intensity can be further converted into protein copy number using a calibration curve.

**Cell Proliferation Assay.** A total of 33,000 or 66,000 cells per well were seeded into six-well plates. At 6 h later, the medium was replaced with fresh medium and the cells were incubated at 37 °C for 24, 48, and 72 h. At each time point indicated, microscopic images were taken and number of cells, normalized by the images' area, was computed using MatLab.

1. Kravchenko-Balasha N, et al. (2012) On a fundamental structure of gene networks in living cells. *Proc Natl Acad Sci USA* 109(12):4702–4707.
2. Laidler K (1996) A glossary of terms used in chemical kinetics, including reaction dynamics (IUPAC Recommendations 1996). *Pure Appl Chem* 68(1):149–192.
3. Levine RD (2005) *Molecular Reaction Dynamics* (Cambridge Univ Press, Cambridge, UK).
4. Levine RD, Bernstein RB (1974) Energy disposal and energy consumption in elementary chemical reactions. Information theoretic approach. *Acc Chem Res* 7(12):393–400.
5. Remacle F, Kravchenko-Balasha N, Levitzki A, Levine RD (2010) Information-theoretic analysis of phenotype changes in early stages of carcinogenesis. *Proc Natl Acad Sci USA* 107(22):10324–10329.
6. Mayer JE, Mayer MG (1966) *Statistical Mechanics* (Wiley, New York).
7. McQuarrie DA (2000) *Statistical Mechanics* (University Science Books, Sausalito, CA).
8. Gross A, Li CM, Remacle F, Levine RD (2013) Free energy rhythms in *Saccharomyces cerevisiae*: A dynamic perspective with implications for ribosomal biogenesis. *Biochemistry* 52(9):1641–1648.
9. Alhassid Y, Levine RD (1980) Experimental and inherent uncertainties in the information theoretic approach. *Chem Phys Lett* 73(1):16–20.
10. Gross A, Levine RD (2013) Surprisal analysis of transcripts expression levels in the presence of noise: A reliable determination of the onset of a tumor phenotype. *PLoS ONE* 8(4):e61554.
11. Wang MY, et al. (2006) Mammalian target of rapamycin inhibition promotes response to epidermal growth factor receptor kinase inhibitors in PTEN-deficient and PTEN-intact glioblastoma cells. *Cancer Res* 66(16):7864–7869.
12. Wang J, et al. (2012) Quantitating cell–cell interaction functions with applications to glioblastoma multiforme cancer cells. *Nano Lett* 12(12):6101–6106.



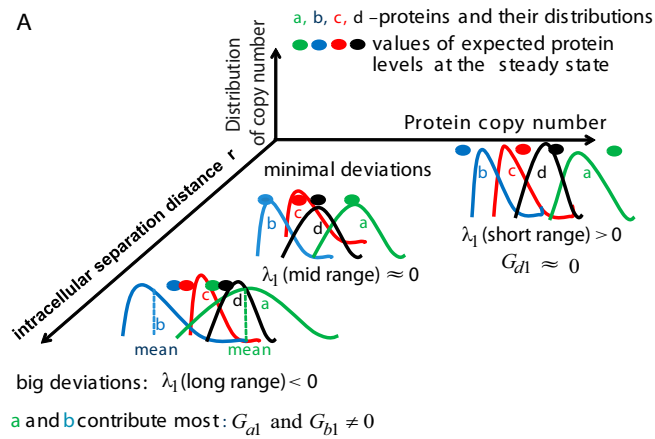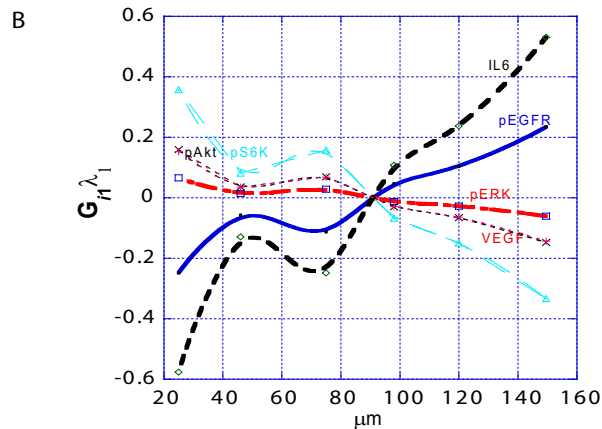

**Fig. S2.** Surprisal analysis of protein expression levels as a function of distance in U87EGFRvIII cells. (A) Illustration of surprisal analysis for a system with four measured proteins at three distance ranges. The steady-state term and one constraint ( $\alpha = 1$ ) are illustrated. Surprisal analysis identifies protein expression levels at the steady state (the colored dots) for proteins a–d. Proteins a and b contribute most to the  $\alpha = 1$  constraint ( $G_{a1}$  and  $G_{b1}$  are relatively big) as indicated by large differences between the measured mean protein levels and the expected steady-state levels. Protein d barely deviates at all distance ranges. The constraint  $\alpha = 1$  has its largest weights [ $\lambda_1(r) \neq 0$ ] at the long and short distance ranges, but is essentially zero at the midranges, implying that this midrange distance corresponds to the steady state of the cells. (B)  $G_{i1}\lambda_{i1}(r)$  products as calculated for U87EGFRvIII cells.  $G_{i1}\lambda_{i1}(r)$  represents the extent of deviation of each protein  $X_i$  from the steady state in U87EGFRvIII cells.  $G_{i1}\lambda_{i1}(r)$  for all measured proteins are plotted.



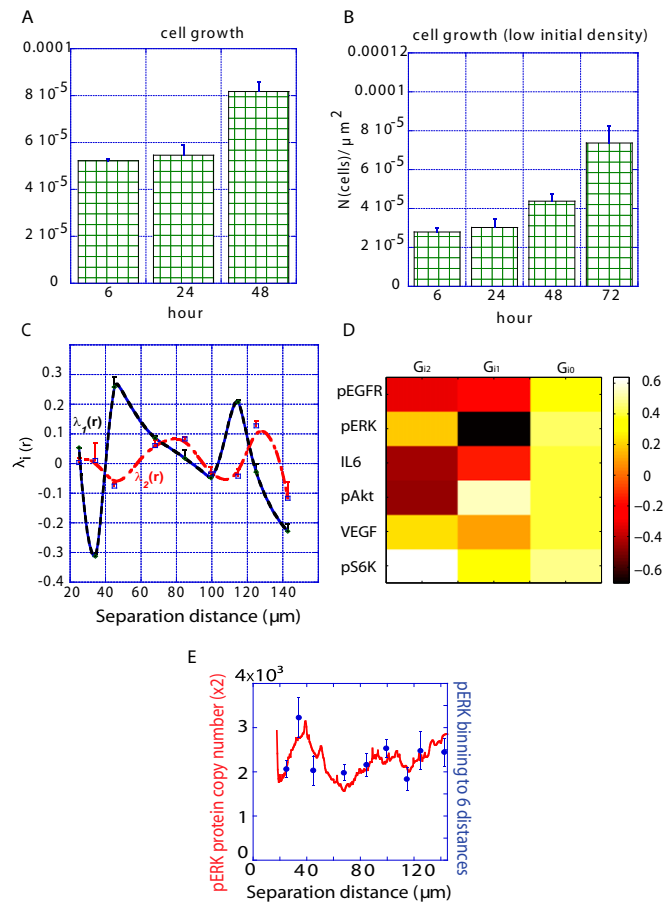

**Fig. S5.** Cell density analysis using bulk experiments (A and B) and results of surprisal analysis using two-cell SCBC experiments for U87PTEN cells (C and D). U87PTEN cells were seeded at a density of 66,000 cells per well (A) and 33,000 cells per well (B) in six-well plates. Plots represent time-course analysis of the cell density as described in Fig. S1. Number of cells was divided by the area. Values are mean values  $\pm$  SD (at least  $n = 4$ ). (C) Surprisal analysis was performed using mean values of phosphorylation/secretion as a function of distance range (mean values were calculated from  $16 \leq n \leq 70$  cell pairs).  $\lambda_{\alpha}(r)$  represents extent of deviation of the EGFR network from the steady state in U87PTEN cells as a function of distance.  $\lambda_{\alpha}(r)$  for the constraints  $\alpha = 1, 2$  are plotted. The error bars for  $\lambda_{\alpha}(r)$  were calculated by propagating errors associated with the mean values of measured proteins as a function of distance and as indicated in *Surprisal Analysis*. (D) Extent of participation in the biological processes ( $G_{i\alpha}$ ), related to the constraints  $\alpha = 0, 1, 2$  was computed for every detected protein. (E) SCBC data showing the measured level of phospho-ERK as a function of cell separation distance from 310 pairs of U87PTEN cells (smooth red curve). The data were binned into nine distance ranges for every measured protein (blue dots). The  $16 \leq N \leq 67$  cell pairs were analyzed for every distance range.





**Table S1. List of reagents for GBM single/two-cell proteomic assay**

| Reagent                                   | Source and sequences                                                                              |
|-------------------------------------------|---------------------------------------------------------------------------------------------------|
| Antibody name                             |                                                                                                   |
| Mouse antihuman phospho-EGFR              | R&D Y1068                                                                                         |
| Biotin-labeled goat antihuman EGFR        | R&D BAF231                                                                                        |
| Antihuman phospho-ERK kit                 | R&D DYC1825                                                                                       |
| Anti-IL-6 kit                             | R&D DYC206                                                                                        |
| Antihuman phospho-mTOR kit                | R&D DYC1665                                                                                       |
| Antihuman phospho-Akt1 kit                | R&D DYC2289                                                                                       |
| Anti-VEGF kit                             | R&D DYC293B                                                                                       |
| Antihuman p70 s6 kinase                   | R&D DYC896                                                                                        |
| Oligonucleotide name                      |                                                                                                   |
| 2X A-3'-polyA                             | ATCCTGGAGCTAAGTCCGTAAAAAAAAAAAAAAAAAAAAAAAAAATCCTGGAGCTAAGTCCGTAAAAAAAAAAAAAAAAAAAAAAAAA          |
| 2X B-3'-polyA                             | GCCTCATTGAATCATGCCTAAAAAAAAAAAAAAAAAAAAAAAAAGCCTCATTGAATCATGCCTAAAAAAAAAAAAAAAAAAAAAAAAA          |
| 2X C-3'-polyA                             | GCACTCGTCTACTATCGCTAAAAAAAAAAAAAAAAAAAAAAAAAAGCACTCGTCTACTATCGCTAAAAAAAAAAAAAAAAAAAAAAAAA         |
| A'-D-D                                    | ATGGTCGAGATGTCAGAGTAAAAAAAAAAAAAAAAATGGTCGAGATGTCAGAGTAAAAAAAAAAAAAAAAATACGGACTTAGCTCCAGGAT       |
| D3'                                       | NH <sub>2</sub> -AAAAAAAAAAAAAAAAATACTCTGACATCTCGACCAT                                            |
| B'-E-E                                    | ATGTGAAGTGGCAGTATCTAAAAAAAAAAAAAAAAAATGTGAAGTGGCAGTATCTAAAAAAAAAAAAAAAAAATAGGCATGATTCAATGAGGC     |
| E3'                                       | NH <sub>2</sub> -AAAAAAAAAAAAAAAAATAGATACTGCCACTTCACAT                                            |
| C'-F-F                                    | ATCAGGTAAGGTTACCGGTAAAAAAAAAAAAAAAAAATCAGGTAAGGTTACCGGTAAAAAAAAAAAAAAAAAATAGCGATAGTAGACGAGTGC     |
| F3'                                       | NH <sub>2</sub> -AAAAAAAAAAAAAAAAATACCGTGAACCTTACCTGAT                                            |
| A'-G-G                                    | GAGTAGCCTTCCCGAGCATTAAAAAAAAAAAAAAAAAGAGTAGCCTTCCCGAGCATTAAAAAAAAAAAAAAAAATACGGACTTAGCTCCAGGAT    |
| G'                                        | NH <sub>2</sub> -AAAAAAAAAAAAAAAAATGCTCGGGAAGGCTACTC                                              |
| B'-H-H                                    | ATTGACCAAAGTGGGTGCGAAAAAAAAAAAAAAAAATTGACCAAAGTGGGTGCGAAAAAAAAAAAAAAAAATAGGCATGATTCAATGAGGC       |
| H'                                        | NH <sub>2</sub> -AAAAAAAAAAAAAAAAACGCACCGCAGTTGGTCAAT                                             |
| C'-I-I                                    | TGCCCTATTGTTGCGTCGGAAAAAAAAAAAAAAAAATGCCCTATTGTTGCGTCGGAAAAAAAAAAAAAAAAATAGCGATAGTAGACGAGTGC      |
| I'                                        | NH <sub>2</sub> -AAAAAAAAAAAAAAAAATCCGACGCAACAATAGGGCA                                            |
| A'-J-J                                    | TCTTCTAGTTGTCGAGCAGGAAAAAAAAAAAAAAAAATCTTCTAGTTGTCGAGCAGGAAAAAAAAAAAAAAAAATACGGACTTAGCTCCAGGAT    |
| J'                                        | NH <sub>2</sub> -AAAAAAAAAAAAAAAAACTGCTCGACAACACTAGAAGA                                           |
| B'-K-K                                    | TAATCTAATTCTGGTCGCGGAAAAAAAAAAAAAAAAATCTAATTCTGGTCGCGGAAAAAAAAAAAAAAAAATAGGCATGATTCAATGAGGC       |
| K'                                        | NH <sub>2</sub> -AAAAAAAAAAAAAAAAACCGCAGCAGAAATTAGATTA                                            |
| C'-L-L                                    | GTGATTAAGTCTGCTTCCGGCAAAAAAAAAAAAAAAAAATGATTAAGTCTGCTTCCGGCAAAAAAAAAAAAAAAAAATAGCGATAGTAGACGAGTGC |
| L'                                        | NH <sub>2</sub> -AAAAAAAAAAAAAAAAAGCCGAAGCAGACTTAATCAC                                            |
| Streptavidin cy 5,<br>cell lysis buffer   | Cell Signaling                                                                                    |
| FBS                                       | Sigma-Aldrich                                                                                     |
| Protease/phosphatase<br>inhibitor mixture | Cell Signaling                                                                                    |
| Alexa 514<br>succinimidyl ester           | Invitrogen                                                                                        |
| CMFDA                                     | Invitrogen                                                                                        |

**Table S2. The input data for SVD analysis [ $X_i(r)$  values from U87EGFRVIII cells]**

| Protein | Distance, $\mu\text{m}$ |         |         |         |         |         |
|---------|-------------------------|---------|---------|---------|---------|---------|
|         | 25                      | 46      | 75      | 98      | 120     | 149.5   |
| pEGFR   | 698.1                   | 837.5   | 830.1   | 1,620.5 | 2,070.0 | 1,981.7 |
| pERK    | 2,960.9                 | 3,258.8 | 3,211.3 | 5,051.3 | 5,931.0 | 5,544.1 |
| IL-6    | 773.4                   | 1,514.7 | 1,398.3 | 2,517.8 | 3,222.8 | 5,304.8 |
| pAkt    | 4,131.4                 | 3,824.3 | 5,003.8 | 6,796.2 | 7,428.8 | 6,891.8 |
| VEGF    | 1,793.0                 | 1,965.0 | 2,148.6 | 2,560.2 | 2,980.7 | 2,971.0 |
| pS6K    | 4,324.3                 | 4,259.3 | 4,501.1 | 5,024.9 | 5,365.1 | 5,280.5 |

**Table S3.  $\lambda_{\alpha}(r)$  values for U87EGFRvIII cells**

| Constraint $\alpha$ | $\lambda_{\alpha}, 25 \mu\text{m}$ | $\lambda_{\alpha}, 46 \mu\text{m}$ | $\lambda_{\alpha}, 75 \mu\text{m}$ | $\lambda_{\alpha}, 98 \mu\text{m}$ | $\lambda_{\alpha}, 120 \mu\text{m}$ | $\lambda_{\alpha}, 149 \mu\text{m}$ |
|---------------------|------------------------------------|------------------------------------|------------------------------------|------------------------------------|-------------------------------------|-------------------------------------|
| 0                   | 18.6                               | 19.0                               | 19.1                               | 20.0                               | 20.4                                | 20.5                                |
| 1                   | 0.7                                | 0.2                                | 0.3                                | -0.1                               | -0.3                                | -0.7                                |
| 2                   | 0.1                                | -0.2                               | -0.1                               | 0.1                                | 0.2                                 | -0.1                                |
| 3                   | 0.0                                | 0.1                                | -0.1                               | 0.0                                | 0.0                                 | 0.0                                 |
| 4                   | 0.0                                | 0.0                                | 0.0                                | 0.0                                | 0.0                                 | 0.0                                 |
| 5                   | 0.0                                | 0.0                                | 0.0                                | 0.0                                | 0.0                                 | 0.0                                 |

**Table S4.  $\lambda_{\alpha}(r)$  values for U87PTEN cells**

| Constraint $\alpha$ | $\lambda_{\alpha}, 125 \mu\text{m}$ | $\lambda_{\alpha}, 34 \mu\text{m}$ | $\lambda_{\alpha}, 45 \mu\text{m}$ | $\lambda_{\alpha}, 68 \mu\text{m}$ | $\lambda_{\alpha}, 85 \mu\text{m}$ | $\lambda_{\alpha}, 99 \mu\text{m}$ | $\lambda_{\alpha}, 119 \mu\text{m}$ | $\lambda_{\alpha}, 125 \mu\text{m}$ | $\lambda_{\alpha}, 143 \mu\text{m}$ |
|---------------------|-------------------------------------|------------------------------------|------------------------------------|------------------------------------|------------------------------------|------------------------------------|-------------------------------------|-------------------------------------|-------------------------------------|
| 0                   | 17.78                               | 18.20                              | 18.08                              | 17.8                               | 17.79                              | 18.12                              | 17.88                               | 18.07                               | 17.86                               |
| 1                   | 0.05                                | -0.31                              | 0.26                               | 0.09                               | 0.02                               | -0.05                              | 0.21                                | -0.03                               | -0.22                               |
| 2                   | -0.01                               | 0.00                               | -0.08                              | 0.06                               | 0.09                               | -0.04                              | -0.04                               | 0.13                                | -0.11                               |
| 3                   | 0.04                                | -0.08                              | -0.06                              | 0.02                               | -0.01                              | -0.06                              | 0.03                                | 0.03                                | 0.09                                |
| 4                   | 0.06                                | 0.03                               | -0.03                              | 0.02                               | -0.07                              | 0.01                               | 0.02                                | 0.00                                | -0.03                               |
| 5                   | -0.06                               | 0.00                               | -0.02                              | 0.02                               | -0.02                              | 0.02                               | 0.04                                | 0.01                                | 0.00                                |
| 6                   | 0.00                                | 0.00                               | 0.00                               | 0.00                               | 0.00                               | 0.00                               | 0.00                                | 0.00                                | 0.00                                |
